# Supplementary material for: Scale dependence of coral reef oases and their environmental correlates
Source: PubMed Central journal article supplement — Ecol Appl. 2022 Jun 16;32(7):e2651. doi: 10.1002/eap.2651 (PMC9787915; doi:10.1002/eap.2651), 2022-06-16
Supplement: EAP-32-e2651-s001.pdf [file EAP-32-e2651-s001.pdf]

1 **Supporting Information.** Elahi, R., Edmunds, P.J., Gates, R.D., Kuffner, I.B., Barnes, B.B.,  
2 Chollett, I., Courtney, T.A., Guest, J.R., Lenz, E.A., Toth, L.T., Viehman, T.S., Williams, I.D.  
3 2022. Scale dependence of coral reef oases and their environmental correlates. Ecological  
4 Applications.

5

6 **Appendix S1.**

7

8 Any use of trade, firm, or product names is for descriptive purposes only and does not imply  
9 endorsement by the U.S. Government.

10 **Section S1. Supporting Methods**

11

12 Defining spatiotemporal vs spatial oases

13 We used time-series data from our previous analysis of spatiotemporal oases (Guest et al. 2018)  
14 to examine the sensitivity of oasis designation to temporal replication. How many years of data  
15 do we need to eliminate errors in designating a given reef site as an oasis? And conversely, what  
16 is the error rate when we have only one year of data? The latter question is directly relevant to  
17 the spatial analysis we present in this paper. We consider the oases identified from the complete  
18 time-series (Guest et al. 2018) as the most accurate designation because they are based on 11 to  
19 24 years of data for each of four regions (Florida Keys, US Virgin Islands, main Hawaiian  
20 Islands, and French Polynesia).

21

22 We used simulations to examine the consequence of varying the number of years available for  
23 analysis. Each simulation consisted of drawing a random number ( $i$ ) of years from the complete  
24 time-series in each region, and then designating each reef site as an oasis or not, based on the  
25 proportion of occasions where a site exhibited coral cover two standard deviations above its  
26 regional mean value (i.e.,  $z$ -score  $> 2$ ). Whereas Guest et al. (2018) considered any site that had a  
27 positive  $z$ -score to be a potential spatiotemporal oasis, we used two standard deviations in our  
28 simulations because this was the threshold used to assign spatial oases in the current study. For  
29 each set of simulations ( $n = 1,000$ ) with a given number of years  $i$ , we calculated the percent of  
30 true/false positives and negatives, with corresponding quartiles. For example, a true positive  
31 correctly identifies an oasis (i.e., sensitivity), and a false positive misidentifies a site as an oasis.  
32 Even with only one year of data, false positive error rates were minimal (0 – 5%) and true oases

33 were always identified correctly (i.e., sensitivity was 100%) for the US Virgin Islands, main  
34 Hawaiian Islands, and French Polynesia, (Fig. S1), suggesting that the assignment of oases with  
35 the stricter criteria used in this study was robust to subsampling. However, error rates were  
36 considerable for the Florida Keys, with sensitivity ranging between 70 and 100%. These  
37 misidentifications may be due to the fact that the Florida Keys have been subjected to many and  
38 diverse disturbances over the past few decades (e.g., cold-water intrusions, bleaching, disease;  
39 Courtney et al. 2020). More disturbances would result in greater variability in coral cover, and  
40 thus a higher error rate in oasis designations based on one or only a few years of data.  
41 Considering that our current analysis relies on recent data (2012 – 2017; Fig. S2), after decades  
42 of coral decline, we consider the designation of spatial oases using our highly-replicated dataset  
43 to be reasonably robust to errors arising from frequent disturbances.

44

#### 45 Coral reef data

46 We used data collected by the United States National Oceanic and Atmospheric Administration  
47 (NOAA) Coral Reef Conservation Program's (CCRP) National Coral Reef Monitoring Program  
48 (NCRMP) which monitors reefs in the Pacific and Atlantic Oceans  
49 (<https://www.coris.noaa.gov/monitoring/>). Data on benthic cover in the Pacific Ocean were  
50 collected between 2012 and 2017 by the Coral Reef Ecosystem Program of NOAA's Pacific  
51 Island Fisheries Science Center. At each randomly selected reef site (McCoy et al. 2016), a  
52 digital camera (Canon PowerShot S110, 12.1 megapixel) recorded an area of 0.7 m<sup>2</sup> of the  
53 benthos at 1 m intervals along a 30 m transect line (30 photographs site<sup>-1</sup>). These photographs  
54 were analyzed using stratified-random point counts (10 points photograph<sup>-1</sup>) to estimate the  
55 percentage cover of coral species and genera, as well as other benthic groups (Williams et al.

56 2019). Data on benthic cover in the western Atlantic (Florida, Puerto Rico, and the U.S. Virgin  
57 Islands) were collected between 2013 and 2017 by NOAA's NCRMP program and partners.  
58 Regions were sampled every two years. A grid-based stratified random design was used to select  
59 sample locations. Line-point-intercept transects (15 m in length) were used to estimate benthic  
60 cover to the lowest possible taxonomic resolution (scleractinian corals, as well as calcified  
61 octocorals and hydrozoan corals), functional group (other benthic organisms), or substratum  
62 type. For the purposes of our analyses, we summed the total percentage cover of calcifying  
63 corals as our response variable. We acknowledge that using total percent cover may mask  
64 important dynamics of coral functional groups or taxa (Nyström 2006, Darling et al. 2019) or  
65 population demographics (Hughes 1996, Edmunds and Elahi 2007), but it does correlate well  
66 with one measure of a reef community's ability to produce calcium carbonate structures (coral  
67 calcification capacity; Guest et al. 2018). Here, we use total cover as an aggregate metric of coral  
68 reef condition to illustrate our modeling approach to identifying the correlates of oases, but the  
69 approach can be extended to any continuous metric that can be used to assign a binary  
70 categorization of oasis / not oasis.

71

## 72 Environmental predictors of coral reef oases

73 To determine which environmental features were associated with the occurrence of coral oases,  
74 we compiled remote sensing data from several sources. We selected predictors hypothesized to  
75 influence coral cover from macroecological (> 1000 km) to local scales (< 1 km), including  
76 abiotic and socioeconomic covariates. We used the Marine Socio-Environmental Covariates  
77 (MSEC) dataset to obtain net primary productivity, wave energy, land area, and human  
78 population density (Yeager et al. 2017). We also derived sea-surface temperature, light

79 attenuation in the water column, and storm activity from other published databases (Table S2).  
80 These variables were chosen due to previously demonstrated associations with coral cover (e.g.,  
81 Williams et al. 2015, Darling et al. 2019), or hypothesized relationships based on mechanistic  
82 biological understanding (e.g., through laboratory experiments). In addition to using a measure  
83 of central tendency (i.e., the mean) for primary productivity, temperature, light attenuation, and  
84 wave exposure, we also considered a measure of variability (i.e., coefficient of variation; CV).  
85 With the mean and CV, we were able to characterize the physical regime in as few parameters as  
86 possible. We did not include depth as a covariate because a statistical analysis demonstrated no  
87 relationship ( $\chi^2 = 0.002$ ,  $P = 0.97$ ) between coral cover and depth at each site. That is, we  
88 compared a linear mixed-effects model (random intercepts of sub-jurisdiction) with a coefficient  
89 for depth to a null model with only an intercept term. We also visualized the relationship  
90 between coral cover and depth for each jurisdiction in Fig. S3. The extent to which relationships  
91 between environmental covariates and oasis occurrence changes with spatial extent is unclear,  
92 and we describe some of our expectations below.

93  
94 *Temperature.* Sea-surface temperature (SST) was obtained from the National Aeronautics and  
95 Space Administration (NASA). For each site, we extracted the mean and variance of monthly  
96 mean products of SST to characterize the thermal environment in as few parameters as possible.  
97 Specifically, level-3 BIN monthly composites (Jan 2003 – Dec 2017) of MODIS SST (nighttime  
98 4 $\mu$ m) acquired from NASA OBPG archives (<https://oceancolor.gsfc.nasa.gov/cgi/l3>). These were  
99 mapped using the SeaDAS (version 7.4) routine l3mapgen to a cylindrical equidistant projection  
100 with 2.5 arcminute resolution and boundaries of 15S – 29N, 144E – 64W (longitude 0 = 180).  
101 Cubic interpolation was used to fill gaps in the data, which resulted primarily from land and

102 persistently cloudy conditions in equatorial Pacific regions. Pixels identified as land (according  
103 to the GSHHS version 2.3.7 "high" resolution landmask, mapped to the same projection as  
104 above; Wessel and Smith 1996) were removed. The mean and variance was derived from the  
105 calculated monthly mean SST. Although it would have been useful to obtain an estimate of  
106 higher frequency temperature variability, as corals may benefit from exposure to large thermal  
107 fluctuations on daily to weekly scales (e.g., Safaie et al. 2018), we chose to calculate summary  
108 statistics using monthly means because of the highly variable number of satellite observations  
109 per grid cell over shorter timescales due to cloudy conditions. Moreover, our monthly estimates  
110 of SST mean and variance were highly correlated ( $r > 0.98$ ) with weekly estimates from the  
111 global Coral Reef Temperature Anomaly Database (CoRTAD Version 5) from the National  
112 Oceanic and Atmospheric Administration ([www.nodc.noaa.gov/sog/cortad/](http://www.nodc.noaa.gov/sog/cortad/)). We standardized  
113 the metric of variability using the coefficient of variation (CV) by squaring the variance and  
114 dividing by the mean. At macroecological scales, coral cover in the central-western Pacific was  
115 positively associated with average SST (Williams et al. 2015) and average minimum SST  
116 (Robinson et al. 2018), consistent with the global distribution of coral reefs in tropical waters.  
117 Therefore, we expected a positive association between coral oases and mean SST at  
118 macroecological scales, but variable associations at local scales depending on the prevalence of  
119 adaptation or acclimatization to 'hot spots' at finer management scales due to variation in water  
120 flow and residence time (Craig et al. 2001, Oliver and Palumbi 2011, Palumbi et al. 2014).  
121 Similarly, long-term variability in temperature may precondition corals to thermal anomalies and  
122 reduce bleaching (Sully et al. 2019), and thus we expected a positive association between coral  
123 oases and the CV of temperature, but the consistency of this expectation across spatial extents  
124 was unclear.

125  
126 *Light attenuation.* Light attenuation (quantified as the diffuse attenuation coefficient for  
127 downwelling irradiance at 490nm;  $K_d490$  in  $m^{-1}$ ) was obtained from the National Aeronautics  
128 and Space Administration (NASA) (Barnes et al. 2013). Higher values of  $K_d490$  represented  
129 greater light attenuation and thus lower water clarity and vice versa. Light attenuation, as  
130 measured by  $K_d490$ , includes suspended particles (which both absorb and scatter light) and  
131 dissolved organic matter (DOM; which only absorbs light). In contrast, turbidity describes  
132 particles and not DOM, and thus we do not use the term turbidity to describe  $K_d490$  (e.g., Sully  
133 and van Woesik 2020). For each site, we extracted the mean and variance of  $K_d490$  to  
134 characterize the light environment in as few parameters as possible. Specifically, level-3 BIN  
135 monthly composites (Jan 2003 – Dec 2017) of  $K_d490$  (as derived using the KD2 algorithm)  
136 acquired from NASA OBPG archives (<https://oceancolor.gsfc.nasa.gov/cgi/l3>). These were  
137 mapped using the SeaDAS (version 7.4) routine l3mapgen to a cylindrical equidistant projection  
138 with 2.5 arcminute resolution and boundaries of 15S – 29N, 144E – 64W (longitude 0 = 180).  
139 Cubic interpolation was used to fill gaps in the data, which resulted primarily from land and  
140 persistently cloudy conditions in equatorial Pacific regions. Pixels identified as land (according  
141 to the GSHHS "high" resolution landmask, mapped to the same projection as above) were  
142 removed. The mean and variance was derived from the monthly mean  $K_d490$ , which was  
143 particularly important because seasonal variation (i.e., fewer during cloudy summer months) in  
144 the number of satellite observations precluded the use of a finer temporal resolution (e.g., weekly  
145 estimates of  $K_d490$ ). As with SST, we used CV as a standardized estimate of variability in  $K_d490$   
146 by squaring the variance and dividing by the mean. Due to the fact that high irradiance can  
147 exacerbate temperature-related bleaching in corals (Lesser et al. 1990), protection from high

148 light, through cloud cover or productive nearshore waters, can ameliorate coral bleaching  
149 associated with exceptional warming events (Fitt and Warner 1995, Mumby et al. 2001). The  
150 suspension of sediment in the water column, turbidity, is another mechanism that can reduce  
151 light attenuation. Turbidity is typically considered a stressor to corals that requires specific  
152 mechanisms of adaptation (Anthony and Larcombe 2000), due to the smothering effects of  
153 sedimentation and associated reductions in available light for photosynthesis (Kleypas 1996). In  
154 summary, the remotely sensed measurement of light attenuation ( $K_d490$ ) is influenced  
155 simultaneously by a number of physical and biological processes in the water column, and can  
156 have both positive and negative effects on coral physiology, especially in the context of a  
157 variable thermal environment. A global analysis demonstrated that coral bleaching was  
158 associated positively with  $K_d490$ , but associated negatively with the interaction between  $K_d490$   
159 and SST; whether the interaction reflected the expectation that light attenuation would be  
160 beneficial under thermally stressful conditions was not investigated (Sully and van Woesik  
161 2020). Based on these previous case studies and synthesis, we expected a negative, or complex  
162 association (e.g., intermediate levels of light attenuation as beneficial; Sully and van Woesik  
163 2020), between extinction coefficient  $K_d490$  and the probability of oasis occurrence. Similarly,  
164 we expected a complex association between the CV of light attenuation and oasis occurrence.  
165 For example, higher CV indicates greater inconsistency in the detrimental effects or potential  
166 benefits of reduced irradiance. We did not have explicit hypotheses about how these  
167 relationships would change with spatial extent.

168

169 *Primary productivity.* Estimates of net primary productivity (NPP) in the seawater column based  
170 on NOAA CoastWatch were derived from 8-day composite layers from 2003-2013



171 (<https://coastwatch.pfeg.noaa.gov/erddap/griddap/erdPPbfp28day.graph?productivity>). NPP was  
172 modelled on a 2.5 arcminute grid based on photosynthetically available radiation, SST, and  
173 chlorophyll *a* concentration. The mean of each sampling week (8-day composite) was used for  
174 calculating the mean and standard deviation for the entire period (2003-2013). These latter two  
175 products were downloaded from the MSEC database (Yeager et al. 2017). Each site was then  
176 joined to the nearest (straight-line distance) estimate of primary productivity (i.e., centroid of the  
177 2.5 arcminute grid cell) using the R package `fuzzyjoin` (Robinson 2019). Across the Indo-  
178 Pacific, this metric of net primary productivity was associated with lower coral cover, suggesting  
179 unfavorable conditions for corals in eutrophic areas (Darling et al. 2019). In contrast, coral cover  
180 across the central-western Pacific was associated positively with mean estimates of chlorophyll  
181 *a*, as well as anomalies in chlorophyll *a* (Williams et al. 2015, Robinson et al. 2018), interpreted  
182 to reflect beneficial effects of increased nutrient supply, either directly as an energetic subsidy to  
183 corals, or through the positive, indirect effects of herbivorous fish populations. Thus, the  
184 influence of NPP on sites vary with spatial extent.

185

186 *Wave energy.* Wave energy flux (the power transmitted per unit of wavefront width) at a 2.5  
187 arcminute resolution was calculated using the WAVEWATCH III hindcast dataset  
188 ([http://polar.ncep.noaa.gov/waves/CFSR\\_hindcast.shtml](http://polar.ncep.noaa.gov/waves/CFSR_hindcast.shtml)), which spanned 31 years at a 3-hour  
189 temporal resolution. Estimates of wave energy were modified at sheltered locations by  
190 considering wind speed, fetch and depth (Marchand and Gill 2017). Mean wave energy was  
191 calculated for each day, and then used for calculating mean and standard deviation for the entire  
192 period (1979-2009). These latter two products were downloaded from the MSEC database  
193 (Yeager et al. 2017). Each site was then joined to the nearest (straight-line distance) estimate of

194 wave energy (i.e., centroid of the 2.5 arcminute grid cell) using the R package `fuzzyjoin`  
195 (Robinson 2019). At macroecological scales, coral cover is associated negatively with mean  
196 wave energy (Robinson et al. 2018, Darling et al. 2019) and the magnitude of wave anomalies  
197 (Williams et al. 2015), due to fragmentation and mortality caused by large physical disturbances.  
198 However, wave energy can also mitigate the deleterious effects of high temperature anomalies at  
199 local scales through the effects of internal waves (Wall et al. 2015, Wyatt et al. 2020), hurricanes  
200 (Manzello et al. 2007), and water flow (Nakamura and van Woesik 2001), and thus the  
201 consistency of wave energy effects across spatial extent is unclear.

202

203 *Storms.* Storm data were obtained from the International Best Track Archive for Climate  
204 Stewardship (IBTrACS v03r10) (Knapp et al. 2010) which merges storm information from  
205 multiple climate centers into one product with a common format. Initial dates vary according to  
206 the source agency, but all data are available from 1897 through 2016 or 2017. Data for 2017 for  
207 the North Atlantic basin (the only basin missing data with sampling that year) were  
208 complemented with data from NOAA's National Hurricane Center. We limited our study to  
209 storms at Saffir-Simpson intensity three (i.e., Category 3; sustained wind speed  $\geq 96$  knots) and  
210 above. Storms reaching Category 3 and higher are considered major storms because of their  
211 potential for generating waves of sufficient energy to cause significant loss of life and damage  
212 (Simpson and Saffir 1974). For each site, we calculated the number of major storms within a  
213 radius of 100 km. This area of influence reflects the grid size commonly used in storm  
214 climatological studies (Elsner et al. 2012) and encompasses potential damage from storms to  
215 coral communities observed in situ (Woodley et al. 1981, Treml et al. 1997, Puotinen 2004,  
216 Gardner et al. 2005). The frequency of major storms was calculated for 30 years before the date

217 of site sampling to provide an estimate of storm exposure that was comparable to the duration of  
218 other metrics considered in this study. As described for ‘wave energy’ above, we expected that  
219 over large spatial extents, periodic cyclone impacts would have a negative impact on coral cover  
220 because of physical damage to the reef. However, hurricanes can also provide short-term relief  
221 from thermal stress (Manzello et al. 2007), which may result in a more complex relationship with  
222 coral oases at smaller spatial extents.

223

224 *Land area.* The total amount of land area within a 50 km radius of each site was used as a proxy  
225 for terrestrial inputs (e.g., nutrients, pollution) onto coral reefs, and was calculated using the 0.25  
226 arcminute the global, self-consistent, hierarchical, high-resolution shoreline (GSHHS) database  
227 (Wessel and Smith 1996). This product was downloaded from the MSEC database (Yeager et al.  
228 2017). We hypothesized that greater land area would be associated with a lower probability of  
229 oasis occurrence, if land area is indeed a proxy for negative terrestrial influences to nearshore  
230 coral reefs. The amount of rainfall and the inclination of land likely influence the flow of  
231 terrestrial subsidies into nearshore habitats, but we do not consider these characteristics in our  
232 analysis.

233

234 *Human population density.* The number of people within a 50 km radius of each site in 2015 was  
235 used as a proxy for human impacts on coral reefs. The population count estimates were produced  
236 by the Socioeconomic Data and Applications Center at a resolution of 0.5 arcminute. This  
237 product was downloaded from the MSEC database (Yeager et al. 2017). Human population  
238 density is typically assumed to be correlated positively with harmful impacts, including  
239 pollution, fishing, and coastal modifications. Coral cover was associated negatively with

240 uninhabited islands in the central Pacific (Smith et al. 2016), and associated negatively with  
241 population gravity (a function of human population size and reef accessibility) (Darling et al.  
242 2019) in the Indo-Pacific. In contrast, human population size was not associated with coral cover  
243 in a global synthesis (Bruno and Valdivia 2016), and thus the overall effect of this factor is not  
244 clear and may depend on spatial extent.

245

#### 246 Summarizing predictors and assessing multicollinearity

247 Each site was associated with a 2.5 arcminute grid cell for the purposes of our statistical model.  
248 Temperature and light attenuation were estimated using the centroid of the site grid cells. For the  
249 variables that were calculated for each specific site (i.e., land area, human population density),  
250 the mean value was calculated using all the sites within a grid cell. The same was done for  
251 estimates of primary productivity and wave energy, but in this case, the mean value was the same  
252 as the individual value for each site, because the resolution of these two predictors was 2.5  
253 arcminutes. Lastly, the total number of storms over the past 30 years was calculated as the mean  
254 across all sites within a given grid cell. The distributions of all covariates at each management  
255 scale are visualized in Figs. S4-S7.

256

257 We assessed multicollinearity among the predictors using variance inflation factors (VIF; Table  
258 S3) and Pearson correlation coefficients ( $r$ ), for each scale of analysis. In general, we followed  
259 the approach suggested by Zuur et al. (2010) and removed predictors with the highest VIFs and  
260 correlation coefficients sequentially until all VIFs  $< 3$  and  $r < 0.7$ , but we also considered the  
261 hypotheses being tested. Specifically, there were strong correlations ( $r > 0.7$ ) between human  
262 population density and land use area, as well as the mean and CV of SST at several spatial

263 extents included in our analysis. When there were strong correlations, we chose to retain  
264 population density rather than land area as an overall measure of human impacts, and we chose  
265 to retain the variability (CV) of SST rather than the mean, to test the hypotheses outlined above.  
266 However, we emphasize that these estimates will be more difficult to interpret due to their  
267 covariance with the other known predictors.

268

269 When predictors were standardized at the cross-basin and basin spatial extents, we removed land  
270 area and mean SST (Table S3). When predictors were standardized by region, we removed land  
271 area but retained both mean and CV of SST (Table S3). At the sub-regional scale, we were able  
272 to retain all the predictors (Table S3). Some sub-regions displayed no variability in the predictors  
273 and thus the standardized predictor was undefined. Therefore, we added a small ( $< 5\%$  of the  
274 minimum observed value) value to human population density, storms, and land area. Due to the  
275 fact that land area was not included at the three larger spatial extents, we also chose to remove it  
276 from the sub-regional analysis. The total number of grid cells ( $i$ ) was 890 across 32 sub-regions  
277 (Table S1).

278 **Section S2: Supporting Tables**

279 Table S1. The number of grid cells (*i*) sampled within each sub-region, nested within region and  
 280 basin, used in the present analysis of oases.

| <b>Basin</b>     | <b>Region</b>              | <b>Sub-region</b>      | <b><i>i</i></b> |
|------------------|----------------------------|------------------------|-----------------|
| Western Atlantic | Florida                    | Keys-lower             | 34              |
| Western Atlantic | Florida                    | Keys-middle            | 31              |
| Western Atlantic | Florida                    | Keys-upper             | 38              |
| Western Atlantic | Florida                    | Southeast Florida      | 41              |
| Western Atlantic | Florida                    | Tortugas               | 51              |
| Western Atlantic | Puerto Rico                | Puerto Rico-east       | 46              |
| Western Atlantic | Puerto Rico                | Puerto Rico-north      | 21              |
| Western Atlantic | Puerto Rico                | Puerto Rico-southwest  | 66              |
| Western Atlantic | US Virgin Islands          | St. John               | 10              |
| Western Atlantic | US Virgin Islands          | St. Thomas             | 18              |
| Western Atlantic | US Virgin Islands          | St. J & St. T offshore | 16              |
| Western Atlantic | US Virgin Islands          | St. Croix              | 33              |
| Pacific          | Mariana Islands            | Guam                   | 30              |
| Pacific          | Mariana Islands            | Marianas-lower         | 24              |
| Pacific          | Mariana Islands            | Marianas-middle        | 18              |
| Pacific          | Mariana Islands            | Marianas-upper         | 6               |
| Pacific          | Mariana Islands            | Rota                   | 8               |
| Pacific          | Northwest Hawaiian Islands | French Frigate         | 30              |
| Pacific          | Northwest Hawaiian Islands | Kure                   | 8               |
| Pacific          | Northwest Hawaiian Islands | Lisianski              | 16              |
| Pacific          | Northwest Hawaiian Islands | Pearl & Hermes         | 23              |
| Pacific          | Main Hawaiian Islands      | Hawaii                 | 74              |
| Pacific          | Main Hawaiian Islands      | Kahoolawe              | 7               |
| Pacific          | Main Hawaiian Islands      | Kauai                  | 26              |
| Pacific          | Main Hawaiian Islands      | Lanai                  | 32              |
| Pacific          | Main Hawaiian Islands      | Maui                   | 37              |
| Pacific          | Main Hawaiian Islands      | Molokai                | 41              |
| Pacific          | Main Hawaiian Islands      | Niihau                 | 19              |
| Pacific          | Main Hawaiian Islands      | Oahu                   | 47              |
| Pacific          | American Samoa             | Manua Islands          | 12              |
| Pacific          | American Samoa             | Rose                   | 4               |
| Pacific          | American Samoa             | Tutuila                | 23              |

281

282 Table S2. Table of predictors considered in this study.  
 283

| <b>Description</b>                                                     | <b>Years</b>                  | <b>Units</b>                           | <b>Source</b>                                                                                             |
|------------------------------------------------------------------------|-------------------------------|----------------------------------------|-----------------------------------------------------------------------------------------------------------|
| Net primary productivity of carbon, mean of weekly means               | 2003-2013                     | mg C m <sup>-2</sup> day <sup>-1</sup> | Yeager et al. 2017                                                                                        |
| Net primary productivity of carbon, standard deviation of weekly means | 2003-2013                     | mg C m <sup>-2</sup> day <sup>-1</sup> | Yeager et al. 2017                                                                                        |
| Wave energy flux, mean of weekly means                                 | 1971-2009                     | kW m <sup>-1</sup>                     | Yeager et al. 2017                                                                                        |
| Wave energy flux, standard deviation of weekly means                   | 1971-2009                     | kW m <sup>-1</sup>                     | Yeager et al. 2017                                                                                        |
| Land area within a 50 km radius                                        |                               | km <sup>2</sup>                        | Yeager et al. 2017                                                                                        |
| Human population count within a 50 km radius                           | 2015                          | individuals                            | Yeager et al. 2017                                                                                        |
| Sea-surface temperature, mean of monthly means                         | 2003-2017                     | °C                                     | NASA OBPG archives<br>( <a href="https://oceancolor.gsfc.nasa.gov">https://oceancolor.gsfc.nasa.gov</a> ) |
| Sea-surface temperature, standard deviation of monthly means           | 2003-2017                     | °C                                     | NASA OBPG archives<br>( <a href="https://oceancolor.gsfc.nasa.gov">https://oceancolor.gsfc.nasa.gov</a> ) |
| Light attenuation, mean of monthly means                               | 2003-2017                     | K <sub>490</sub> in m <sup>-1</sup>    | NASA OBPG archives<br>( <a href="https://oceancolor.gsfc.nasa.gov">https://oceancolor.gsfc.nasa.gov</a> ) |
| Light attenuation, standard deviation of monthly means                 | 2003-2017                     | K <sub>490</sub> in m <sup>-1</sup>    | NASA OBPG archives<br>( <a href="https://oceancolor.gsfc.nasa.gov">https://oceancolor.gsfc.nasa.gov</a> ) |
| Number of category 3, 4, 5 storms within a 100 km radius               | 30 years prior to site survey | count                                  | IBTrACS v03r10, Knapp et al. 2010                                                                         |

284 Table S3. Variance inflation factors (VIF) for the final set of predictors considered for each  
 285 spatial extent. The variance inflation factor was not included (NA) in the table for predictors that  
 286 were removed due to multicollinearity (i.e., correlation coefficients > 0.7 or VIF > 3.0). Note that  
 287 land area was not used for any of the analyses due to collinearity at three of the four spatial  
 288 extents.

| <b>Predictor</b>                           | <b>Cross-basin</b> | <b>Basin</b> | <b>Region</b> | <b>Sub-region</b> |
|--------------------------------------------|--------------------|--------------|---------------|-------------------|
| Human population density within 50km (log) | 1.76               | 1.49         | 1.33          | 1.32              |
| Light attenuation (CV)                     | 1.36               | 1.23         | 1.31          | 1.19              |
| Light attenuation (mean)                   | 2.36               | 2.09         | 1.41          | 1.45              |
| Land area within 50km (log)                | NA                 | NA           | NA            | 1.41              |
| Number of storms in past 30 years          | 1.29               | 1.20         | 1.18          | 1.03              |
| Net primary productivity (CV)              | 1.35               | 1.30         | 1.25          | 1.11              |
| Net primary productivity (mean)            | 1.91               | 1.22         | 1.30          | 1.18              |
| Sea-surface temperature (CV)               | 2.15               | 2.35         | 1.53          | 1.41              |
| Sea-surface temperature (mean)             | NA                 | NA           | 1.67          | 1.28              |
| Wave energy (CV)                           | 1.12               | 1.11         | 1.27          | 1.26              |
| Wave energy (mean)                         | 1.83               | 1.28         | 1.44          | 1.32              |

289



290 Table S4. Bayesian  $P$  values for lack of fit between data simulated from posterior predictive  
 291 distributions and observations for each scale of analysis. Extremely small Bayesian  $P$  values ( $P <$   
 292 0.05) indicate that the model predicted a smaller metric (e.g., the number of oases per grid cell)  
 293 than observed in the data; extremely large Bayesian  $P$  values ( $P < 0.95$ ) indicate that the model  
 294 predicted a larger metric than observed in the data. Goodness of fit was evaluated using a  
 295 Pearson  $\chi^2$  discrepancy metric for binomial data and a Freeman-Tukey discrepancy metric. The  
 296 Pearson discrepancy was calculated as  $\chi^2 = \sum_i \left( \frac{y_i - p_i n_i}{\sqrt{p_i n_i (1 - p_i)}} \right)^2$ , where  $y_i$  is the observed number  
 297 of oases,  $p_i$  is the estimated probability of detection, and  $n_i$  is the number of visits, in grid cell  $i$ .  
 298 To avoid division by zero we added 0.001 to  $p_i$  in the denominator (Tobler et al. 2015, Kéry and  
 299 Royle 2016). The Freeman-Tukey discrepancy was calculated as  $\sum_i (\sqrt{y_i} - \sqrt{p_i n_i})^2$ .

300

| <b>Spatial extent</b> | <b>Pearson <math>\chi^2</math></b> | <b>Freeman-Tukey</b> |
|-----------------------|------------------------------------|----------------------|
| Cross-basin           | 0.46                               | 0.21                 |
| Basin                 | 0.18                               | 0.24                 |
| Region                | 0.12                               | 0.20                 |
| Sub-region            | 0.15                               | 0.13                 |

301

302 Table S5. The direction of each predictor’s coefficient at each spatial extent, along with the  
 303 associated probability of the direction (i.e., the proportion of Markov chain iterations that were  
 304 positive, or negative). Missing values (NA) in the table were for predictors that were removed  
 305 due to multicollinearity (see Table S3), or for predictors whose coefficient switched from  
 306 positive to negative at different spatial extents (e.g., mean wave energy). Coefficient of variation,  
 307 CV.

308

| <b>Predictor</b>                           | <b>Direction</b> | <b>Cross-basin</b> | <b>Basin</b> | <b>Region</b> | <b>Sub-region</b> |
|--------------------------------------------|------------------|--------------------|--------------|---------------|-------------------|
| Human population density within 50km (log) | Negative         | 0.961              | 0.843        | 0.782         | 0.967             |
| Light attenuation (CV)                     | Negative         | 0.598              | NA           | 0.761         | 0.76              |
| Light attenuation (CV)                     | Positive         | NA                 | 0.625        | NA            | NA                |
| Light attenuation (mean)                   | Positive         | 0.891              | 1            | 1             | 1                 |
| Number of storms in past 30 years          | Negative         | 0.846              | 0.566        | 0.579         | NA                |
| Number of storms in past 30 years          | Positive         | NA                 | NA           | NA            | 0.559             |
| Net primary productivity (CV)              | Negative         | 0.715              | 0.773        | 0.611         | 0.819             |
| Net primary productivity (mean)            | Negative         | 0.607              | NA           | NA            | NA                |
| Net primary productivity (mean)            | Positive         | NA                 | 0.728        | 0.692         | 0.595             |
| Sea-surface temperature (CV)               | Negative         | 0.875              | 0.846        | NA            | NA                |
| Sea-surface temperature (CV)               | Positive         | NA                 | NA           | 0.995         | 0.886             |
| Sea-surface temperature (mean)             | Negative         | NA                 | NA           | NA            | 0.596             |
| Sea-surface temperature (mean)             | Positive         | NA                 | NA           | 1             | NA                |
| Wave energy (CV)                           | Negative         | 0.967              | 0.796        | 0.595         | NA                |
| Wave energy (CV)                           | Positive         | NA                 | NA           | NA            | 0.797             |
| Wave energy (mean)                         | Negative         | 0.601              | NA           | 0.758         | NA                |
| Wave energy (mean)                         | Positive         | NA                 | 0.503        | NA            | 0.624             |

309

310  
311 **Section S3: Supporting Figures**

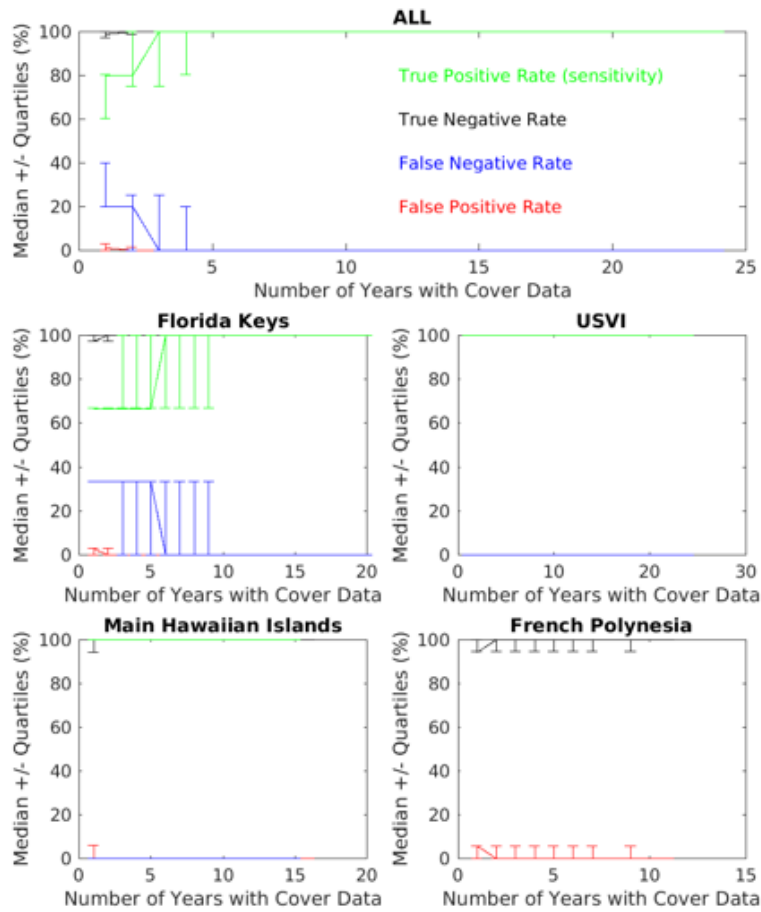

312  
313 Figure S1. Results of simulations to understand the sensitivity of coral oasis designation to  
314 temporal replication (number of years with coral cover data), using time-series data from Guest  
315 et al. (2019). In all plots, the y-axis represents the median percent value (with upper and lower  
316 quartiles) of, for example, the true positive rate (green). That is, what percentage of simulations  
317 assigned each site the ‘true’ designation of an oasis, or not? The true designation is based on the  
318 complete time series of coral cover data within a region. We also include true negative, false  
319 negative, and false positive rates.

320

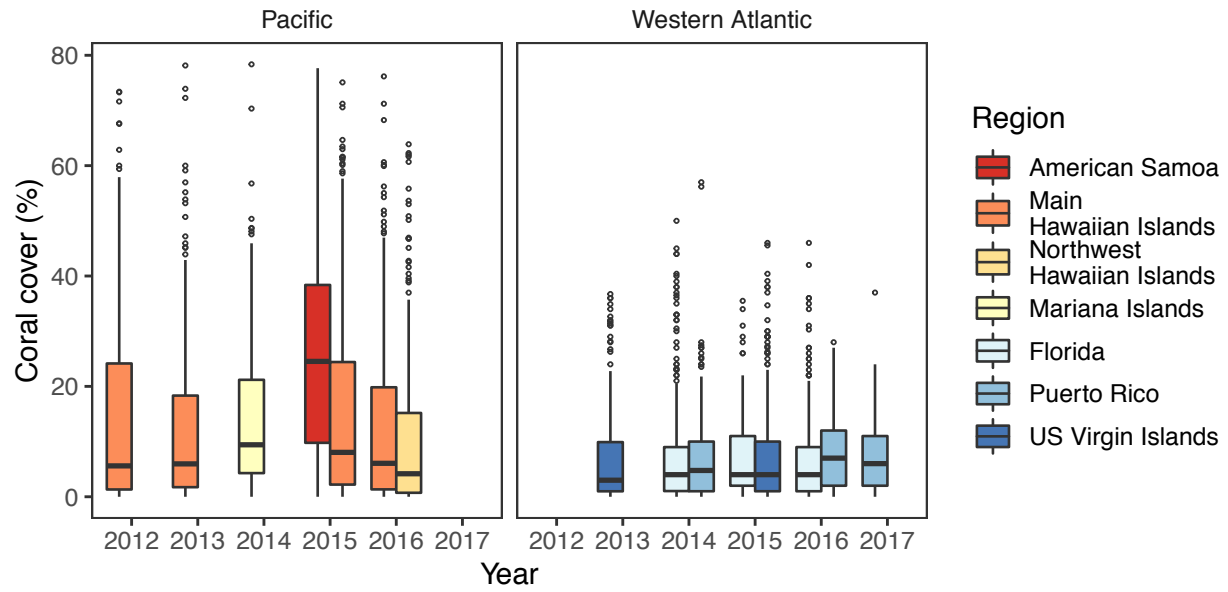

321  
 322 Figure S2. Patterns of coral cover (%) by year and region. Note that some regions were sampled  
 323 only in a single year (e.g., American Samoa, Mariana Islands, Northwest Hawaiian Islands).  
 324 Boxplots display the median and interquartile range (IQR) of data, with outliers plotted as circles  
 325 beyond whiskers when the values are  $1.5 \times$  IQR from the first or third quartile.

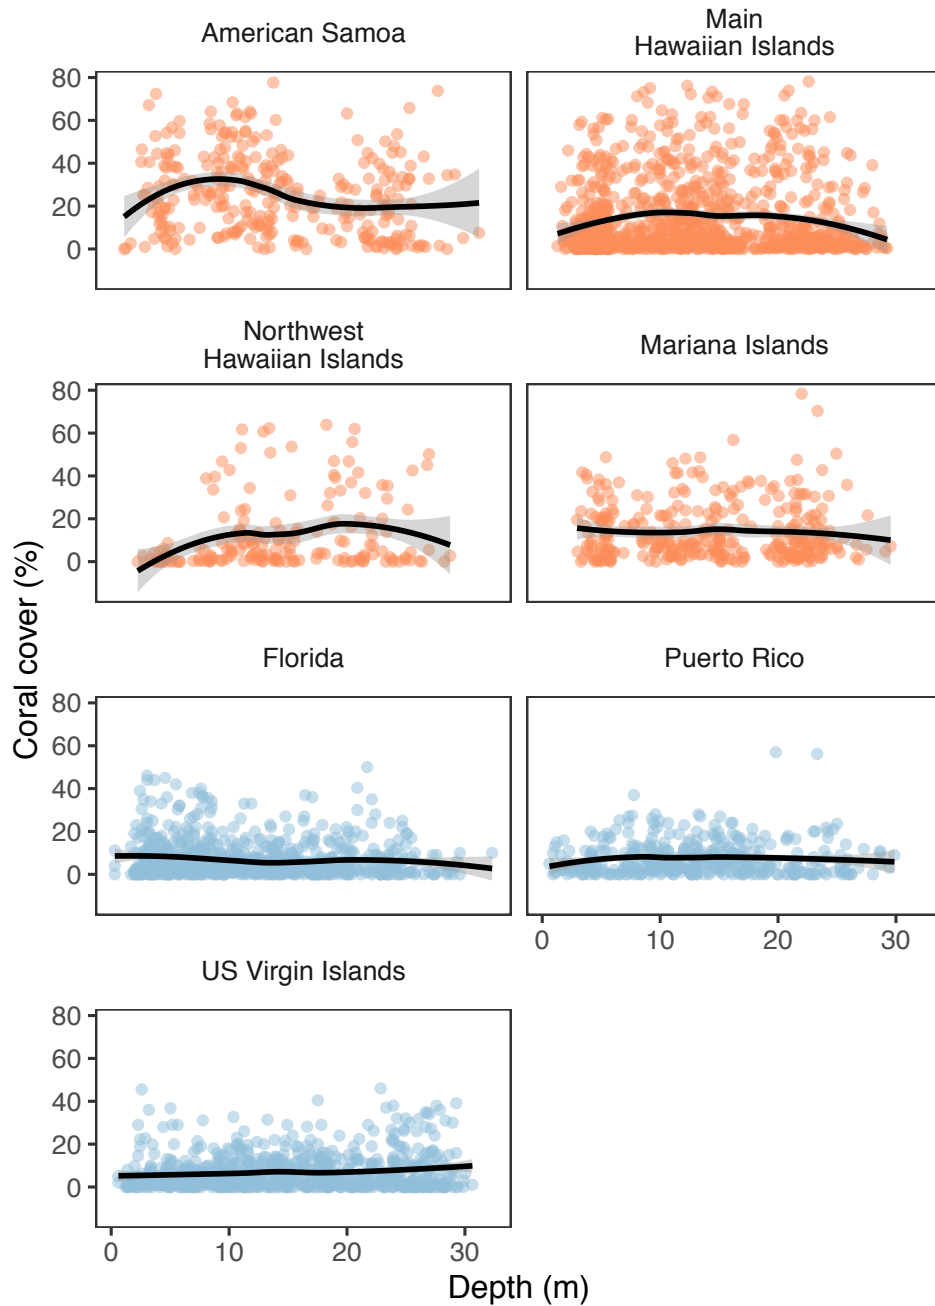

326

327 Figure S3. The relationship between coral cover (%) and depth (m) at the reef sites in each  
 328 region. The orange and blue points represent sites in the western Atlantic and Pacific basins,  
 329 respectively. The line represents a smoothed fit using a generalized additive model to illustrate  
 330 that there is no consistent effect of depth on coral cover.

331

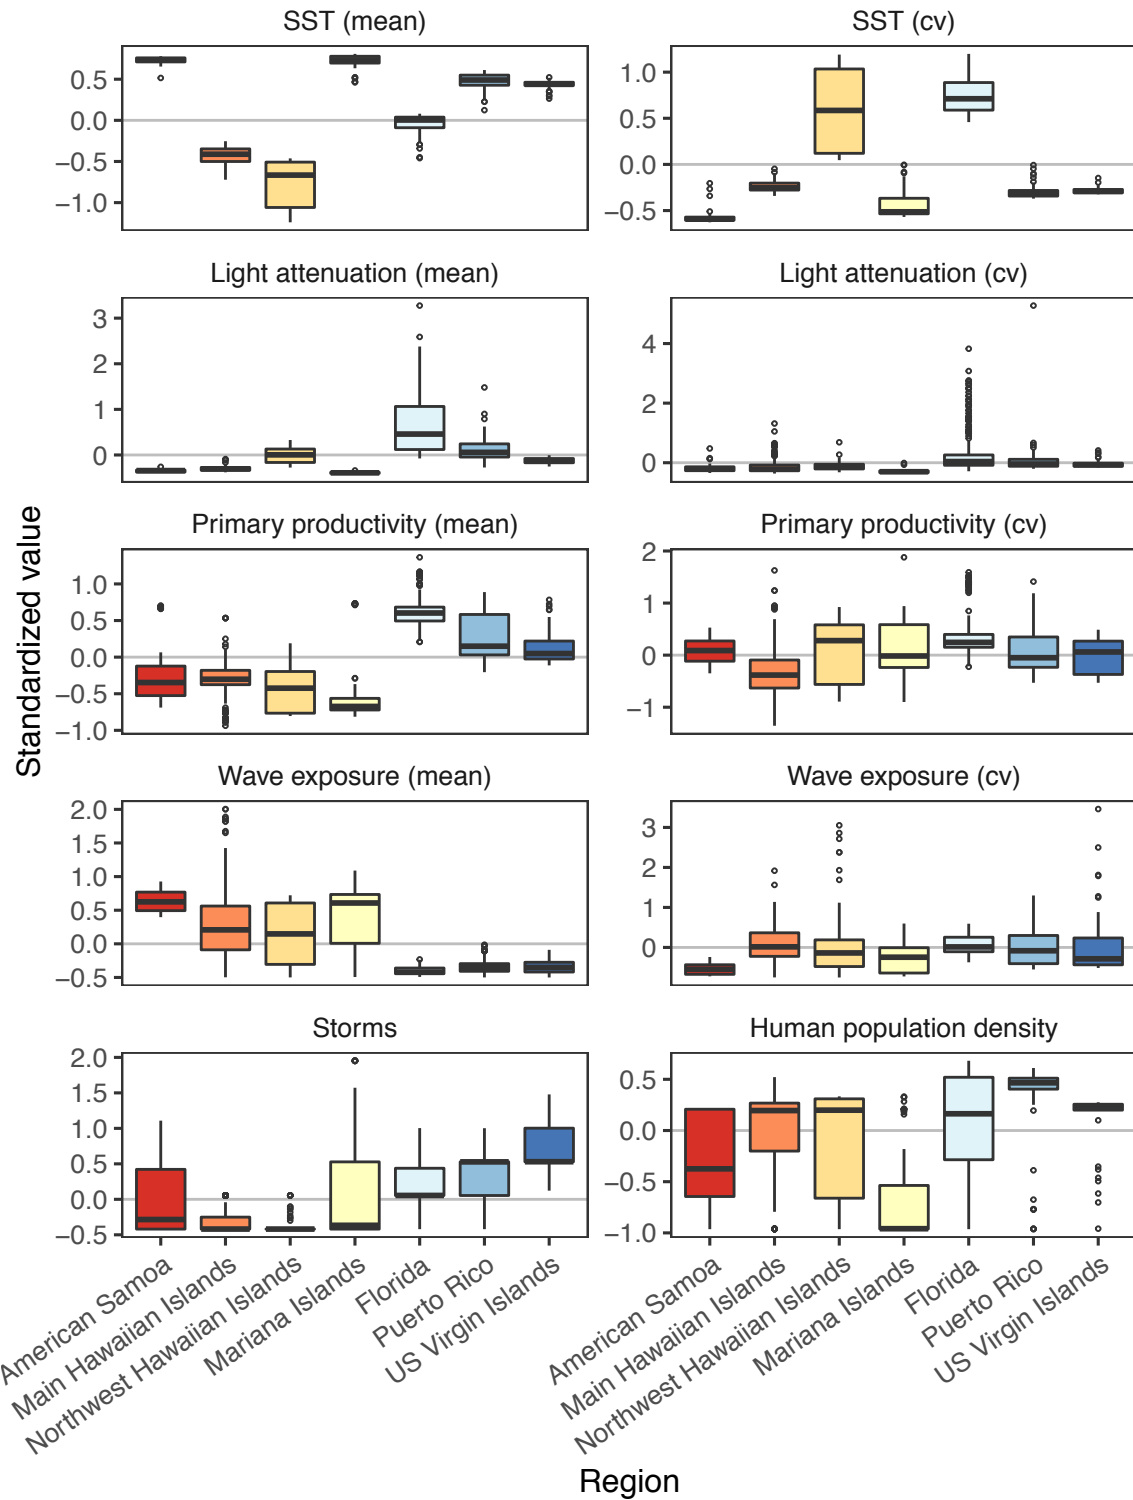

332

333 Figure S4. Distributions of covariates, standardized relative to the entire dataset (i.e., cross-basin

334 extent). Boxplots display the median and interquartile range (IQR) of data, with outliers plotted

335 as circles beyond whiskers when the values are  $1.5 \times \text{IQR}$  from the first or third quartile. Sea-

336 surface temperature, SST; coefficient of variation, CV.

337

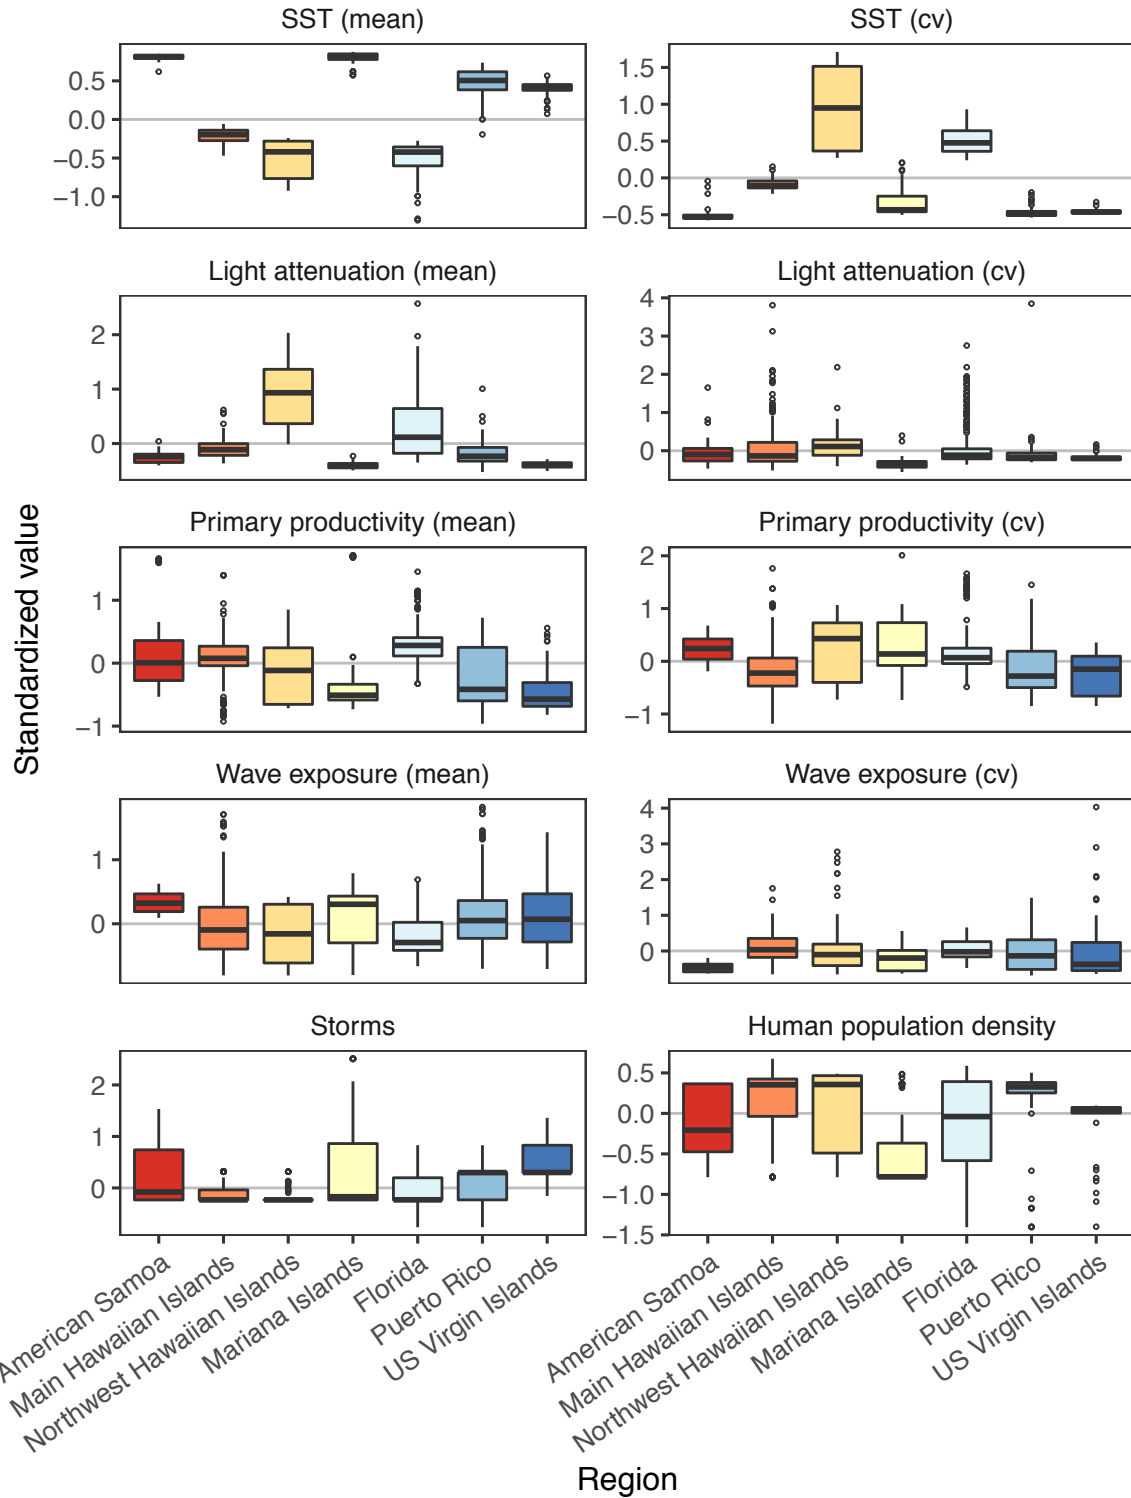

338  
 339 Figure S5. Distributions of covariates, standardized relative to each ocean basin (Pacific, western  
 340 Atlantic). Boxplots display the median and interquartile range (IQR) of data, with outliers plotted



- 341 as circles beyond whiskers when the values are  $1.5 \times \text{IQR}$  from the first or third quartile. Sea-
- 342 surface temperature, SST; coefficient of variation, CV.

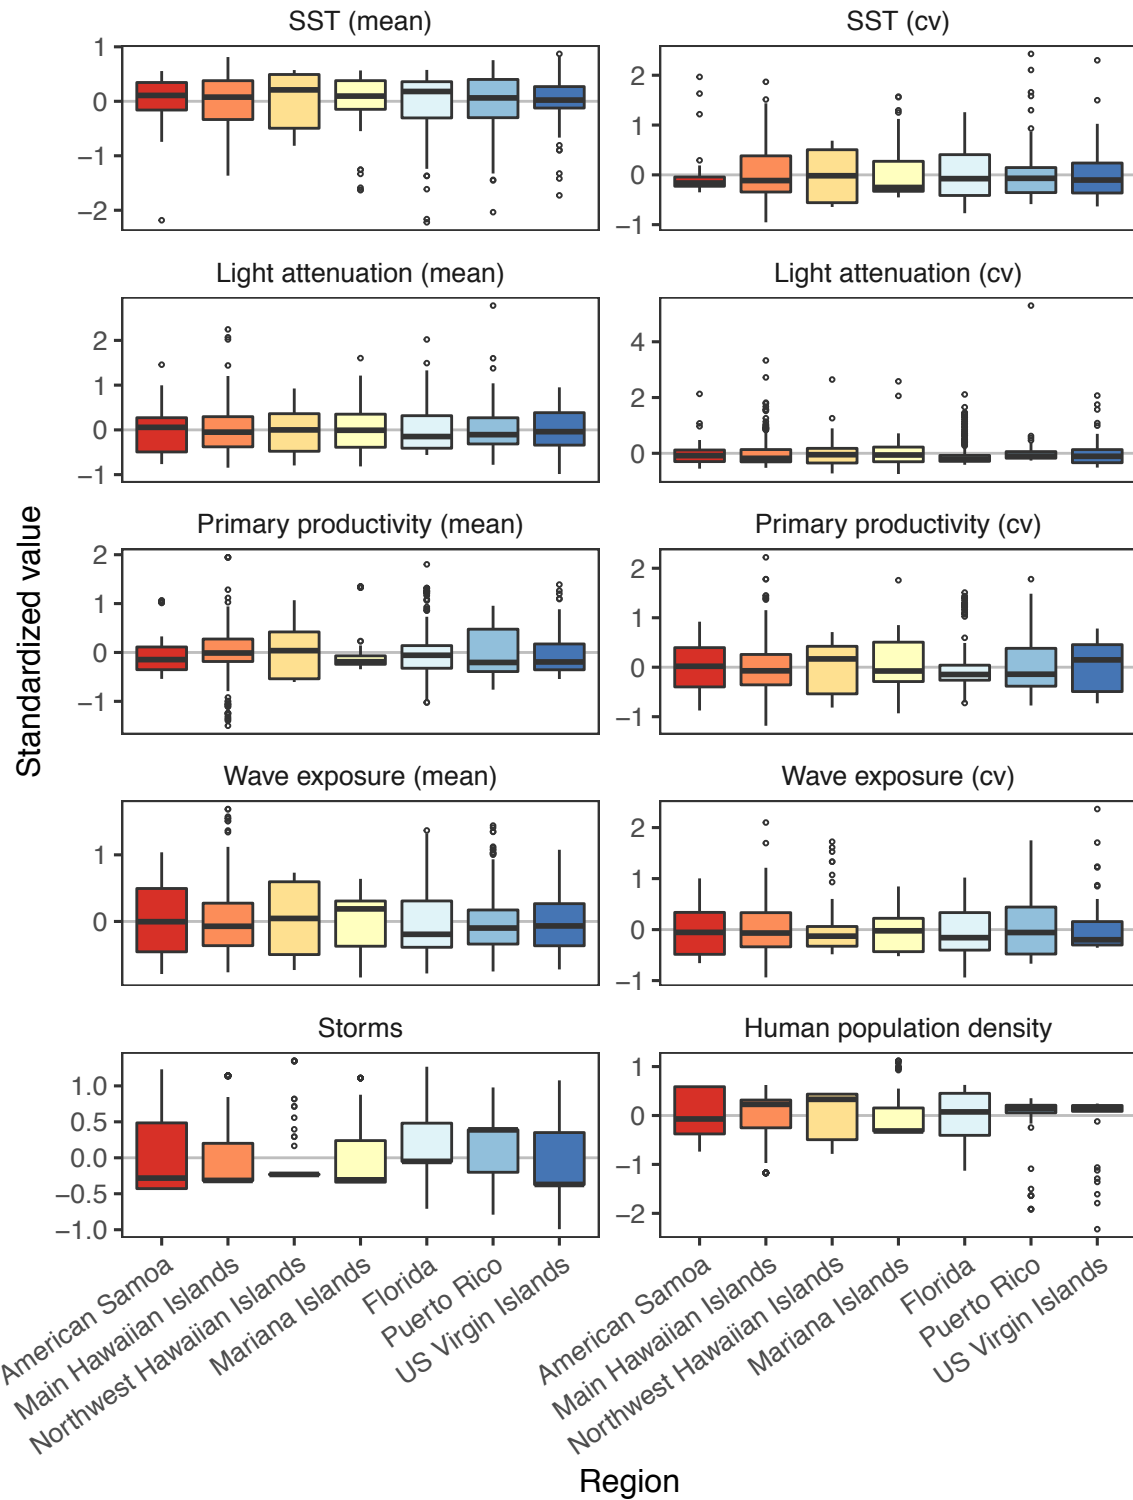

343  
 344 Figure S6. Distributions of covariates, standardized relative to each region. Boxplots display the  
 345 median and interquartile range (IQR) of data, with outliers plotted as circles beyond whiskers

- 346 when the values are  $1.5 \times \text{IQR}$  from the first or third quartile. Sea-surface temperature, SST;
- 347 coefficient of variation, CV.

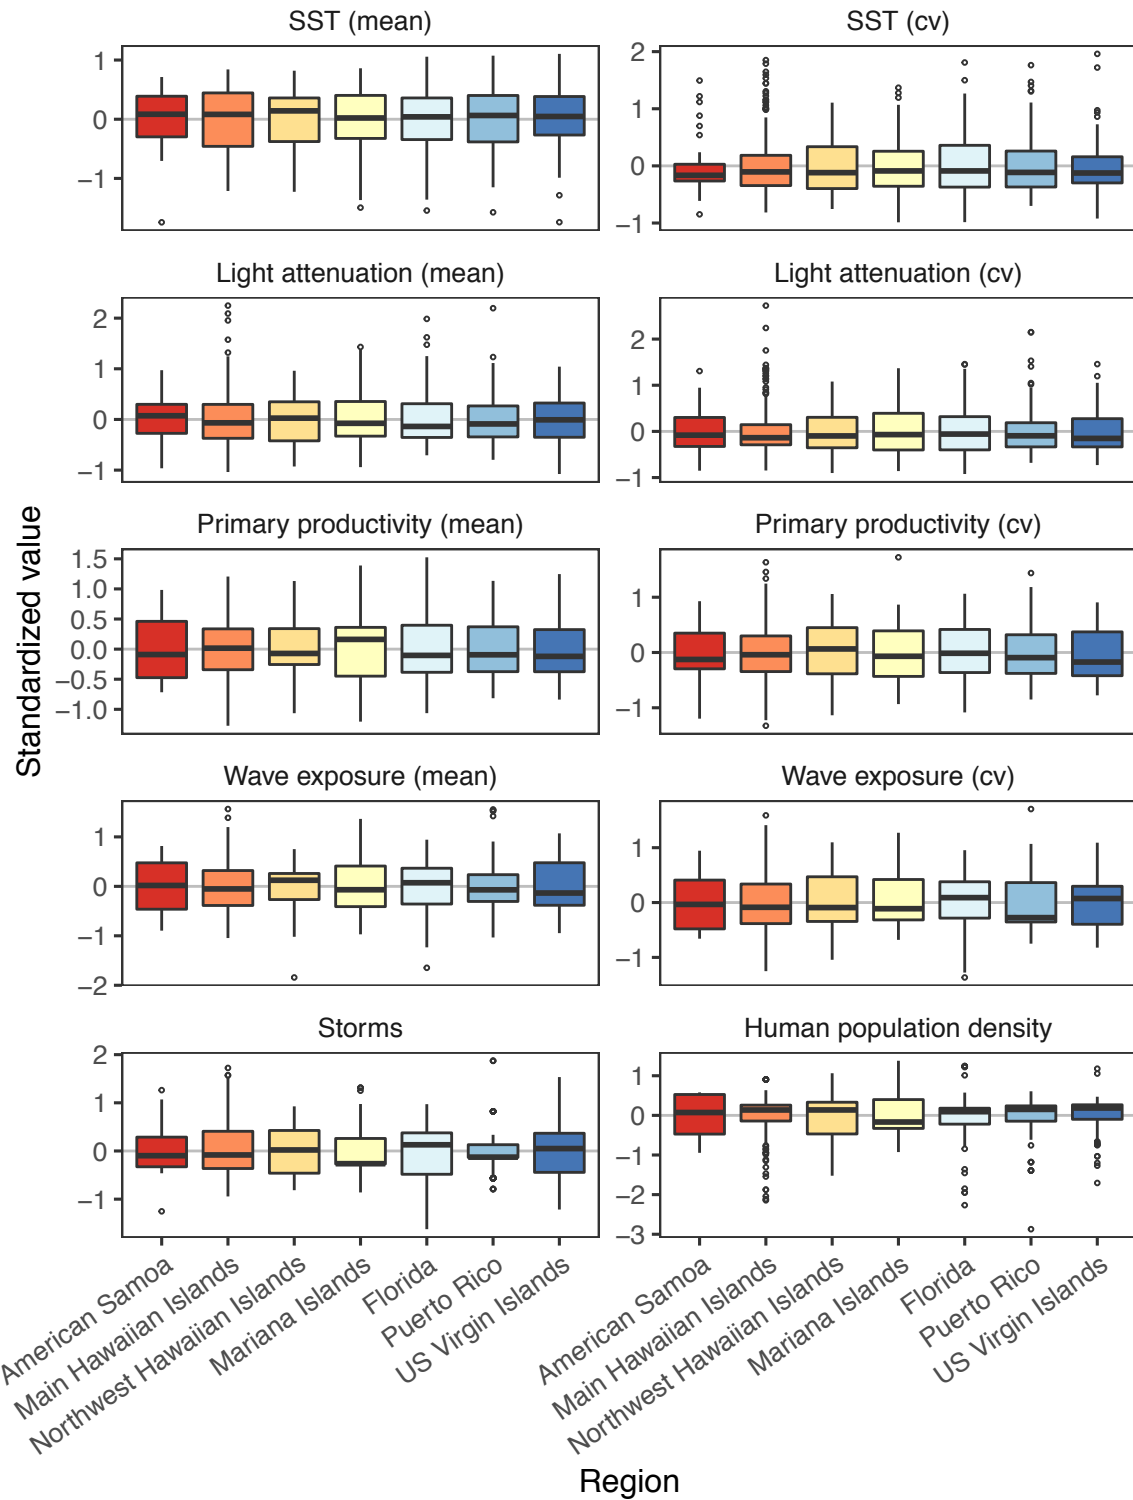

348  
 349 Figure S7. Distributions of covariates, standardized relative to each sub-region. Boxplots display  
 350 the median and interquartile range (IQR) of data, with outliers plotted as circles beyond whiskers

- 351 when the values are  $1.5 \times \text{IQR}$  from the first or third quartile. Sea-surface temperature, SST;
- 352 coefficient of variation, CV.

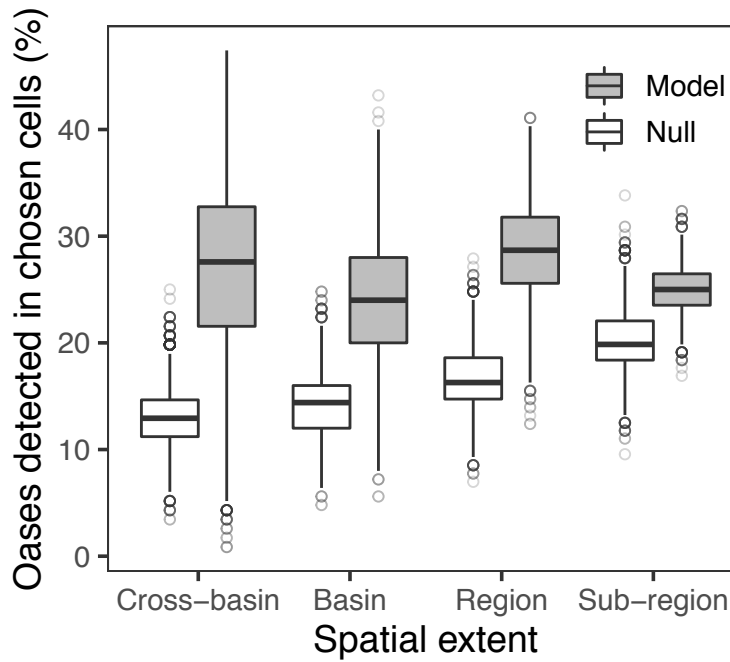

353

354 Figure. S8. The statistical model correctly identified a greater percentage of cells with detected  
 355 coral oases than a null model at four spatial extents. See *Methods* for details. Boxplots display  
 356 the median and interquartile range (IQR) of data, with outliers plotted as circles beyond whiskers  
 357 when the values are  $1.5 \times$  IQR from the first or third quartile.

358

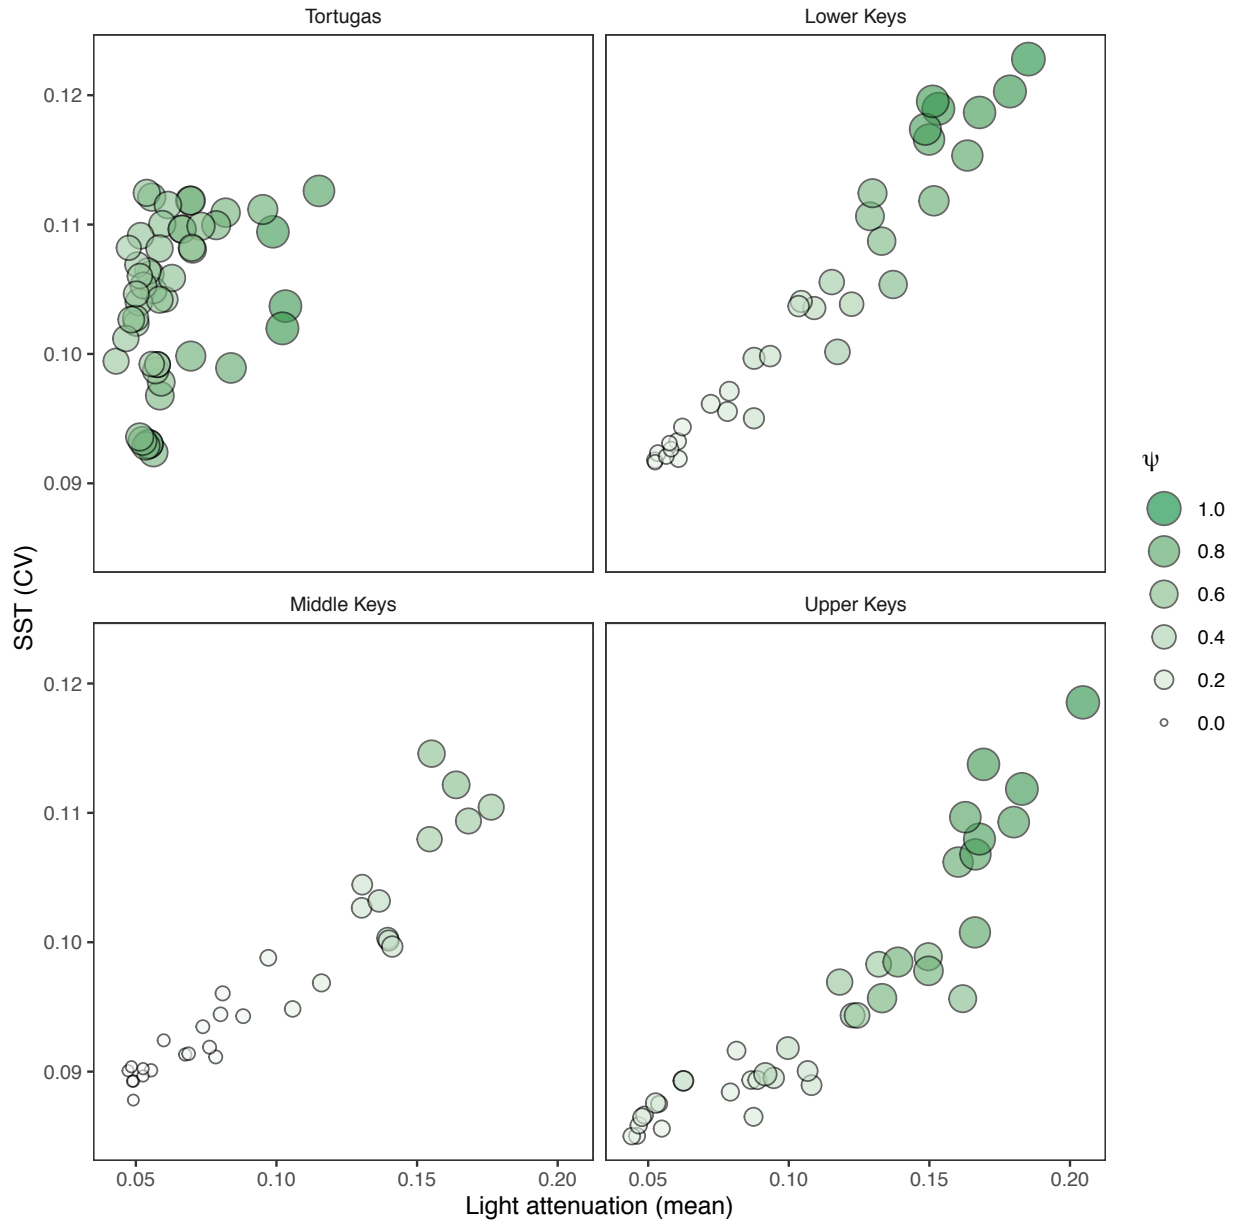

359

360 Figure S9. The relationship between mean light attenuation, the coefficient of variation (CV) in  
 361 sea-surface temperature, and median predicted probability of oasis occurrence ( $\psi$ ) at the regional  
 362 extent in Florida (related to Figure 6).

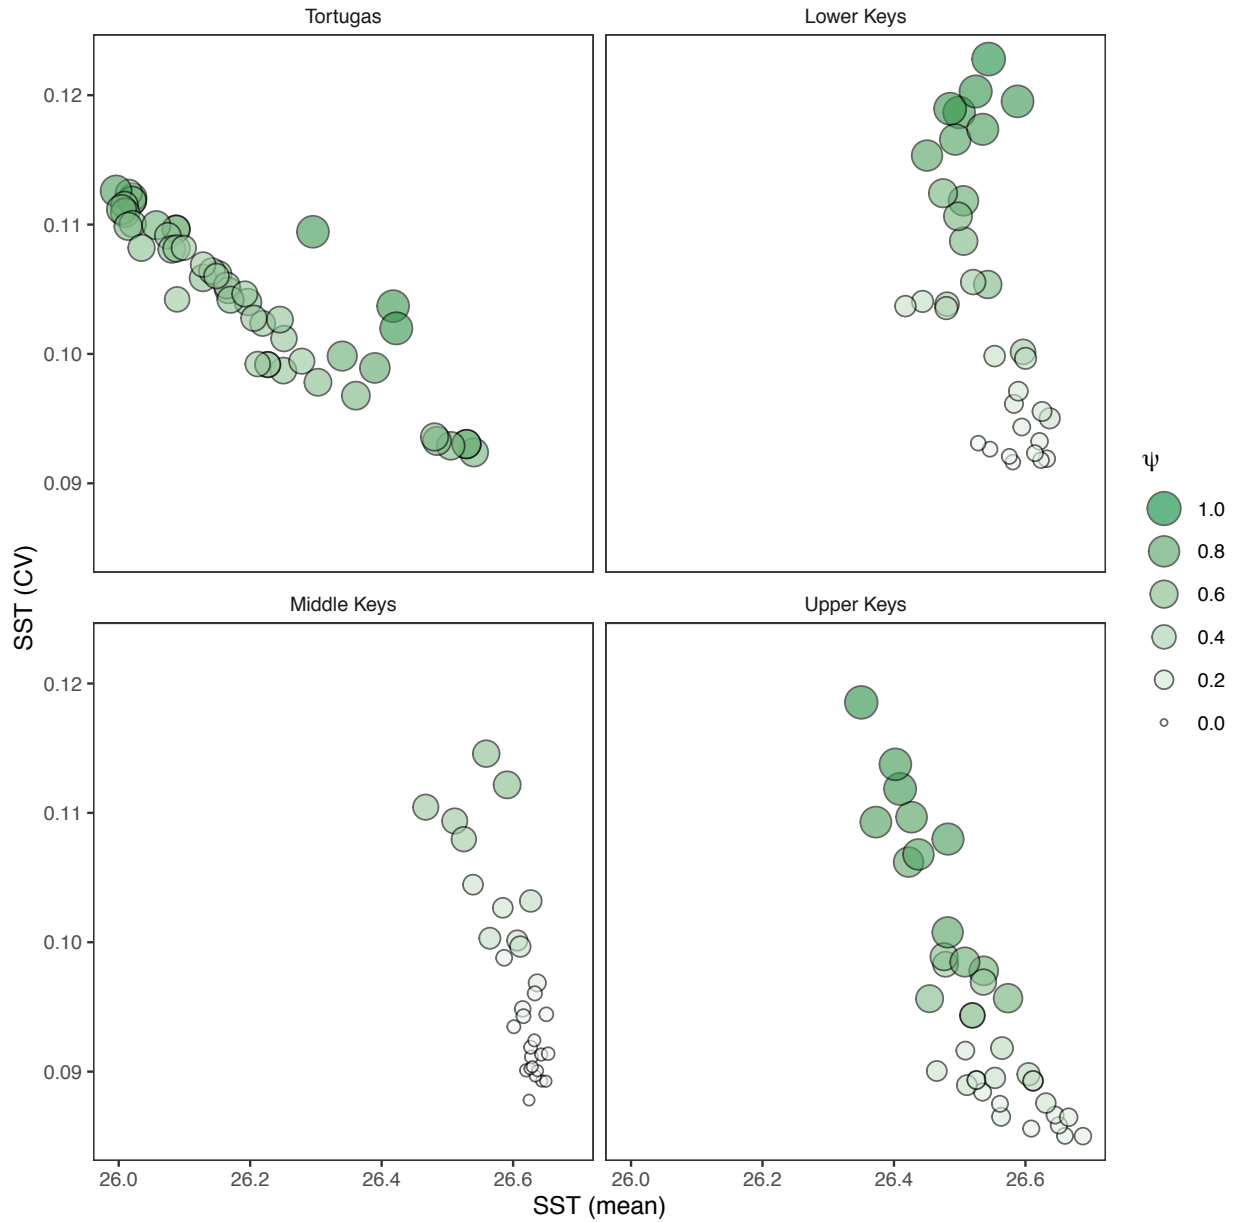

363

364

Figure S10. The relationship between mean sea-surface temperature (SST), the coefficient of

365

variation (CV) in SST, and median predicted probability of oasis occurrence ( $\psi$ ) at the regional

366

extent in Florida (related to Figure 6).



367 **Supporting References**

- 368 Anthony, K., and P. Larcombe. 2000. Coral reefs in turbid waters: sediment-induced stresses in  
369 corals and likely mechanisms of adaptation. Pages 239-244 in Proceedings of the 9th  
370 International Coral Reef Symposium, Bali, Indonesia.
- 371 Barnes, B. B., C. Hu, B. A. Schaeffer, Z. Lee, D. A. Palandro, and J. C. Lehrter. 2013. MODIS-  
372 derived spatiotemporal water clarity patterns in optically shallow Florida Keys waters: A  
373 new approach to remove bottom contamination. *Remote Sensing of Environment*  
374 **134**:377-391.
- 375 Bruno, J. F., and A. Valdivia. 2016. Coral reef degradation is not correlated with local human  
376 population density. *Scientific Reports* **6**:29778.
- 377 Craig, P., C. Birkeland, and S. Belliveau. 2001. High temperatures tolerated by a diverse  
378 assemblage of shallow-water corals in American Samoa. *Coral Reefs* **20**:185-189.
- 379 Darling, E. S., T. R. McClanahan, J. Maina, G. G. Gurney, N. A. Graham, F. Januchowski-  
380 Hartley, J. E. Cinner, C. Mora, C. C. Hicks, and E. Maire. 2019. Social–environmental  
381 drivers inform strategic management of coral reefs in the Anthropocene. *Nature Ecology*  
382 *& Evolution* **3**:1341-1350.
- 383 Edmunds, P. J., and R. Elahi. 2007. The demographics of a 15-year decline in cover of the  
384 Caribbean reef coral *Montastraea annularis*. *Ecological Monographs* **77**:3-18.
- 385 Elsner, J. B., R. E. Hodges, and T. H. Jagger. 2012. Spatial grids for hurricane climate research.  
386 *Climate Dynamics* **39**:21-36.
- 387 Fitt, W., and M. Warner. 1995. Bleaching patterns of four species of Caribbean reef corals. *The*  
388 *Biological Bulletin* **189**:298-307.

389 Gardner, T. A., I. M. Cote, J. A. Gill, A. Grant, and A. R. Watkinson. 2005. Hurricanes and  
390 Caribbean coral reefs: impacts, recovery patterns, and role in long-term decline. *Ecology*  
391 **86**:174-184.

392 Guest, J. R., P. J. Edmunds, R. D. Gates, I. B. Kuffner, A. J. Andersson, B. B. Barnes, I. Chollett,  
393 T. A. Courtney, R. Elahi, K. Gross, E. A. Lenz, S. Mitarai, P. J. Mumby, H. R. Nelson, B.  
394 A. Parker, H. M. Putnam, C. S. Rogers, and L. T. Toth. 2018. A framework for  
395 identifying and characterising coral reef “oases” against a backdrop of degradation.  
396 *Journal of Applied Ecology* **55**:2865-2875.

397 Hughes, T. P. 1996. Demographic approaches to community dynamics: a coral reef example.  
398 *Ecology* **77**:2256-2260.

399 Kéry, M., and J. Royle. 2016. Applied hierarchical modelling in ecology—Modeling  
400 distribution, abundance and species richness using R and BUGS. 783 pages.  
401 Elsevier/Academic Press.

402 Kleypas, J. 1996. Coral reef development under naturally turbid conditions: fringing reefs near  
403 Broad Sound, Australia. *Coral Reefs* **15**:153-167.

404 Knapp, K. R., M. C. Kruk, D. H. Levinson, H. J. Diamond, and C. J. Neumann. 2010. The  
405 international best track archive for climate stewardship (IBTrACS) unifying tropical  
406 cyclone data. *Bulletin of the American Meteorological Society* **91**:363-376.

407 Lesser, M., W. Stochaj, D. Tapley, and J. Shick. 1990. Bleaching in coral reef anthozoans:  
408 effects of irradiance, ultraviolet radiation, and temperature on the activities of protective  
409 enzymes against active oxygen. *Coral Reefs* **8**:225-232.

410 Manzello, D. P., M. Brandt, T. B. Smith, D. Lirman, J. C. Hendee, and R. S. Nemeth. 2007.  
411 Hurricanes benefit bleached corals. *Proceedings of the National Academy of Sciences*  
412 **104**:12035-12039.

413 Marchand, P., and D. Gill. 2017. waver: Calculate Fetch and Wave Energy. R package version  
414 0.2. 0.

415 McCoy, K., A. Heenan, J. M. Asher, P. Ayotte, K. Gorospe, A. E. Gray, K. Lino, J. P. Zamzow,  
416 and I. D. Williams. 2016. Pacific Reef Assessment and Monitoring Program. Data report:  
417 ecological monitoring 2015: reef fishes and benthic habitats of the main Hawaiian  
418 Islands, Northwestern Hawaiian Islands, Pacific Remote Island Areas, and American  
419 Samoa.

420 Mumby, P. J., J. R. Chisholm, A. J. Edwards, S. Andrefouet, and J. Jaubert. 2001. Cloudy  
421 weather may have saved Society Island reef corals during the 1998 ENSO event. *Marine*  
422 *Ecology Progress Series* **222**:209-216.

423 Nakamura, T., and R. van Woesik. 2001. Water-flow rates and passive diffusion partially explain  
424 differential survival of corals during the 1998 bleaching event. *Marine Ecology Progress*  
425 *Series* **212**:301-304.

426 Nyström, M. 2006. Redundancy and response diversity of functional groups: implications for the  
427 resilience of coral reefs. *AMBIO: A Journal of the Human Environment* **35**:30-35.

428 Oliver, T., and S. Palumbi. 2011. Do fluctuating temperature environments elevate coral thermal  
429 tolerance? *Coral Reefs* **30**:429-440.

430 Palumbi, S. R., D. J. Barshis, N. Traylor-Knowles, and R. A. Bay. 2014. Mechanisms of reef  
431 coral resistance to future climate change. *Science* **344**:895-898.

432 Puotinen, M. 2004. Tropical cyclones in the Great Barrier Reef, Australia, 1910–1999: a first  
433 step towards characterising the disturbance regime. *Australian Geographical Studies*  
434 **42**:378-392.

435 Robinson, D. 2019. fuzzyjoin: join tables together on inexact matching. R package version 0.1.5.

436 Robinson, J. P., I. D. Williams, L. A. Yeager, J. M. McPherson, J. Clark, T. A. Oliver, and J. K.  
437 Baum. 2018. Environmental conditions and herbivore biomass determine coral reef  
438 benthic community composition: implications for quantitative baselines. *Coral Reefs*  
439 **37**:1157-1168.

440 Safaie, A., N. J. Silbiger, T. R. McClanahan, G. Pawlak, D. J. Barshis, J. L. Hench, J. S. Rogers,  
441 G. J. Williams, and K. A. Davis. 2018. High frequency temperature variability reduces  
442 the risk of coral bleaching. *Nature communications* **9**:1-12.

443 Simpson, R. H., and H. Saffir. 1974. The hurricane disaster potential scale. *Weatherwise* **27**:169.

444 Smith, J. E., R. Brainard, A. Carter, S. Grillo, C. Edwards, J. Harris, L. Lewis, D. Obura, F.  
445 Rohwer, and E. Sala. 2016. Re-evaluating the health of coral reef communities: baselines  
446 and evidence for human impacts across the central Pacific. *Proceedings of the Royal*  
447 *Society B: Biological Sciences* **283**:20151985.

448 Sully, S., D. Burkepile, M. Donovan, G. Hodgson, and R. Van Woesik. 2019. A global analysis  
449 of coral bleaching over the past two decades. *Nature communications* **10**:1-5.

450 Sully, S., and R. van Woesik. 2020. Turbid reefs moderate coral bleaching under climate-related  
451 temperature stress. *Global Change Biology*.

452 Tobler, M. W., A. Zúñiga Hartley, S. E. Carrillo-Percegué, and G. V. Powell. 2015.  
453 Spatiotemporal hierarchical modelling of species richness and occupancy using camera  
454 trap data. *Journal of Applied Ecology* **52**:413-421.

455 Treml, E., M. Colgan, and M. Keevican. 1997. Hurricane disturbance and coral reef  
456 development: a geographic information system (GIS) analysis of 501 years of hurricane  
457 data from the Lesser Antilles. Pages 541-546 *in* Proc 8th Int Coral Reef Symp.

458 Wall, M., L. Putschim, G. Schmidt, C. Jantzen, S. Khokiattiwong, and C. Richter. 2015. Large-  
459 amplitude internal waves benefit corals during thermal stress. Proceedings of the Royal  
460 Society B: Biological Sciences **282**:20140650.

461 Wessel, P., and W. H. Smith. 1996. A global, self-consistent, hierarchical, high-resolution  
462 shoreline database. Journal of Geophysical Research: Solid Earth **101**:8741-8743.

463 Williams, G. J., J. M. Gove, Y. Eynaud, B. J. Zgliczynski, and S. A. Sandin. 2015. Local human  
464 impacts decouple natural biophysical relationships on Pacific coral reefs. Ecography  
465 **38**:751-761.

466 Williams, I. D., C. S. Couch, O. Beijbom, T. A. Oliver, B. Vargas-Angel, B. D. Schumacher, and  
467 R. E. Brainard. 2019. Leveraging automated image analysis tools to transform our  
468 capacity to assess status and trends of coral reefs. Frontiers in Marine Science **6**.

469 Woodley, J., E. Chornesky, P. Clifford, J. Jackson, L. Kaufman, N. Knowlton, J. Lang, M.  
470 Pearson, J. Porter, and M. Rooney. 1981. Hurricane Allen's impact on Jamaican coral  
471 reefs. Science **214**:749-755.

472 Wyatt, A. S., J. J. Leichter, L. T. Toth, T. Miyajima, R. B. Aronson, and T. Nagata. 2020. Heat  
473 accumulation on coral reefs mitigated by internal waves. Nature Geoscience **13**:28-34.

474 Yeager, L. A., P. Marchand, D. A. Gill, J. K. Baum, and J. M. McPherson. 2017. Marine Socio-  
475 Environmental Covariates: queryable global layers of environmental and anthropogenic  
476 variables for marine ecosystem studies. Ecology **98**:1976-1976.

477 Zuur, A. F., E. N. Ieno, and C. S. Elphick. 2010. A protocol for data exploration to avoid  
478 common statistical problems. *Methods in Ecology and Evolution* **1**:3-14.  
479
